# Supplementary material
Source: PubMed Central journal article supplement (PMC6771880)
Supplement: MMI-112-973-s001.pdf [file MMI-112-973-s001.pdf]

1 **Supplementary Information**

2

3

4 **The Lyme disease spirochete's BpuR DNA- / RNA-binding protein is**

5 **differentially expressed during the mammal-tick infectious cycle, and**

6 **affects translation of the SodA superoxide dismutase**

7

8 Brandon L. Jutras, Christina R. Savage, William K. Arnold,

9 Kathryn G. Lethbridge, Dustin W. Carroll, Kit Tilly, Aaron Bestor, Haining Zhu,

10 Janakiram Seshu, Wolfram R. Zückert, Philip E. Stewart, Patricia A. Rosa,

11 Catherine A. Brissette, and Brian Stevenson

12

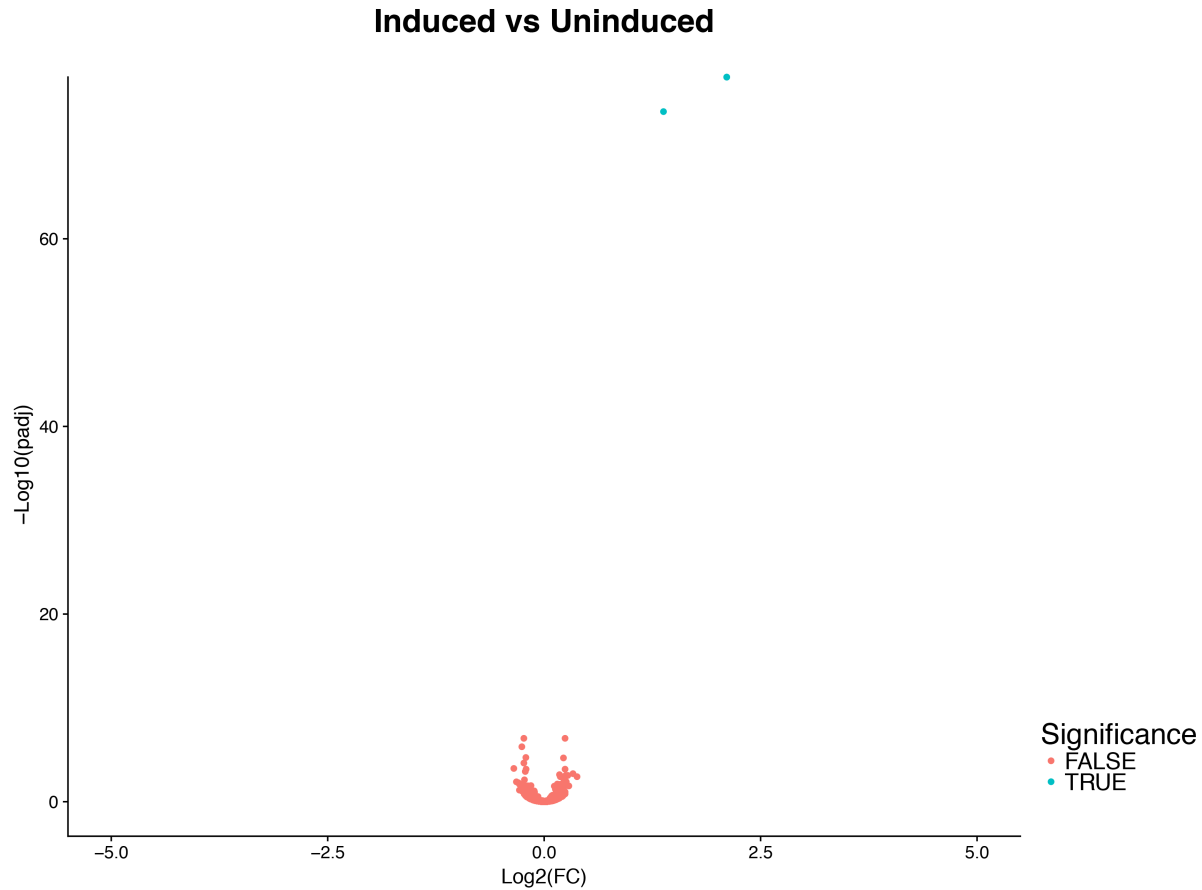

13

14 **Figure S1: Volcano plot of differentially expressed transcripts in *B. burgdorferi* that**  
15 **were induced to produce elevated levels of BpuR, compared to those which produce**  
16 **wild-type levels. *B. burgdorferi* carrying pWA10 (*bpuR* under transcriptional control of an**  
17 **inducible *lac* promoter) were incubated with or without IPTG at 34°C in BSK-II. Bacteria**  
18 **were inoculated at 1x10<sup>6</sup> bacteria/ml, and induced when cultures reached 1x10<sup>8</sup>**  
19 **bacteria/ml. Induced and un-induced cultures were harvested after 24 hours. RNA was**  
20 **isolated, cDNA libraries were prepared, and sequenced. Reads were mapped to the *B.***  
21 ***burgdorferi* genome, counted using Salmon and tested for differential expression using**  
22 **DESeq2 in R. Criteria of >2X change in expression and <0.05 adjusted p-value were used**  
23 **to define significantly changed transcripts. Transcripts that met those criteria are shown**

24 in blue-green (*bpuR* and *hslU*) and those which were expressed at lower levels are shown  
25 in red (all other transcripts).

26

27

28

29 **Table S1: Transcripts that were significantly differentially expressed in BpuR-induced**  
 30 ***B. burgdorferi*.**

31 Differential expression testing results of transcripts which met the criteria of >log<sub>2</sub> fold-  
 32 change and an adjusted p-value (padj) when comparing the induced sample to the un-  
 33 induced sample. The first column contains the gene's common name and the open  
 34 reading frame number assigned to *B. burgdorferi* strain B31 (Fraser *et al.*, 1997). The  
 35 remaining columns include the metrics of expression of each impacted transcript  
 36 including base mean (average normalized count value), log<sub>2</sub>FC (Fold change estimate),  
 37 lfcSE (uncertainty of the log fold change estimate), stat (Wald statistic), pvalue, padj  
 38 (pvalue following Benjamini-Hochberg adjustment).

| <b>Gene</b>             | <b>baseMean</b> | <b>log2FoldChange</b> | <b>lfcSE</b> | <b>stat</b> | <b>pvalue</b> | <b>padj</b> |
|-------------------------|-----------------|-----------------------|--------------|-------------|---------------|-------------|
| <i>bpuR</i> ,<br>BB0047 | 7837.00         | 2.109                 | 0.05317      | 39.66       | 0             | 0           |
| <i>hslU</i> ,<br>BB0295 | 5271.83         | 1.378                 | 0.07413      | 18.59       | 3.653 e-77    | 2.786 e-74  |

39

40

41 **Table S2: DNA oligonucleotides used in this study.**

42 Some oligonucleotides were modified with a biotin on the 5' end. Probes *bpuR*-TaqMan  
 43 and *flaB*-TaqMan were modified on the 5' ends with FAM (6-carboxyfluorescein) and on  
 44 the 3' ends with TAMRA (6-carboxytetramethylrhodamine).

| Oligonucleotide Name | Sequence (5' -> 3')       | Use                                        |
|----------------------|---------------------------|--------------------------------------------|
| <i>bpuR</i> -For     | CTTAAGGCAATAGCGGTTATT     | qRT-PCR of <i>bpuR</i> transcript in ticks |
| <i>bpuR</i> -Rev     | CCATATTCACCATACCCTTTATTA  | qRT-PCR of <i>bpuR</i> transcript in ticks |
| <i>bpuR</i> -TaqMan  | TCCGTTGGCTCTTCTGCAAGGC    | qRT-PCR of <i>bpuR</i> transcript in ticks |
| <i>flaB</i> -For     | TCTTTTCTCTGGTGAGGGAGCT    | qRT-PCR of <i>flaB</i> transcript in ticks |
| <i>flaB</i> -Rev     | TCCTTCCTGTTGAACACCCTCT    | qRT-PCR of <i>bpuR</i> transcript in ticks |
| <i>flaB</i> -TaqMan  | AAACTGCTCAGGCTGCACCGGTTTC | qRT-PCR of <i>flaB</i> transcript in ticks |
| <i>bpuR</i> -qRT-F   | GGAGAGAGAGGGGAACTATAC     | qRT-PCR of <i>bpuR</i> transcript in mice  |
| <i>bpuR</i> -qRT-R   | GCCTTGCAAAGGAGCCAACG      | qRT-PCR of <i>bpuR</i> transcript in mice  |
| <i>fla3</i>          | GGGTCTCAAGCGTCTTGG        | qRT-PCR of <i>flaB</i> transcript in mice  |
| <i>fla4</i>          | GAACCGGTGCAGCCTGAG        | qRT-PCR of <i>flaB</i> transcript in mice  |

|                          |                               |                                                                                    |
|--------------------------|-------------------------------|------------------------------------------------------------------------------------|
| Bio- <i>bpuR</i> -Probe1 | biotin-CCTTCTTTTTAAATCGCCCGCC | PCR of the <i>bpuR</i> - <i>tRNA</i> intergenic region, for DNA-affinity pull-down |
| <i>bpuR</i> -Probe2      | GATTTATTGTAATGTTATTTTTAGCTAGC | PCR of the <i>bpuR</i> - <i>tRNA</i> intergenic region, for DNA-affinity pull-down |
| <i>sodA</i> -RIP-F1      | CCATAGTTTTAGCATCAATATAAGGCT   | PCR of <i>sodA</i> from RIP cDNA                                                   |
| <i>sodA</i> -RIP-R2      | GAAAGTGGGAAGAAATATAAAAATTG    | PCR of <i>sodA</i> from RIP cDNA                                                   |
| <i>dnaK</i> -RIP-F1      | CCATGCTCCATTATAGCTACGCATG     | PCR of <i>dnaK</i> from RIP cDNA                                                   |
| <i>dnaK</i> -RIP-R2      | CCAAAAAGGATATTGCTACAACG       | PCR of <i>dnaK</i> from RIP cDNA                                                   |
| <i>gap</i> -RIP-F1       | GAGCAAGATCAACCACTCTTGTAG      | PCR of <i>gap</i> from RIP cDNA                                                    |
| <i>gap</i> -RIP-R2       | GCCTGTGCCAACAGGTCCAATAG       | PCR of <i>gap</i> from RIP cDNA                                                    |
| Bio- <i>bpuRp</i> -11    | biotin-CAATAATTTACTTATATAAAAA | PCR of the <i>bpuR</i> - <i>tRNA</i> intergenic region, for labeled EMSA probe     |
| <i>bpuRp</i> -11         | CAATAATTTACTTATATAAAAA        | PCR of the <i>bpuR</i> - <i>tRNA</i> intergenic                                    |

|                 |                                  |                                                                                                                            |
|-----------------|----------------------------------|----------------------------------------------------------------------------------------------------------------------------|
|                 |                                  | region, for unlabeled<br>EMSA competitor                                                                                   |
| <i>bpuR</i> -14 | CCACACAAGTTTTTGTACTTGAC          | PCR of the <i>bpuR</i> -<br><i>tRNA</i> intergenic<br>region, for labeled<br>and unlabeled EMSA<br>probe and<br>competitor |
| BpurP-1         | CAATTCCTCCACACAAGTTTTTG          | PCR of the <i>bpuR</i> -<br><i>tRNA</i> intergenic<br>EMSA competitor 5                                                    |
| BpurP-2         | GTACAATTAATTTAGCTTAAATGTAGTCAAGT | PCR of the <i>bpuR</i> -<br><i>tRNA</i> intergenic<br>EMSA competitor 5                                                    |
| BpurP-3         | GACTACATTTAAGCTAAATTAATTGTAC     | PCR of the <i>bpuR</i> -<br><i>tRNA</i> intergenic<br>EMSA competitor 6                                                    |
| BpurP-4         | GATTTATTGTAATGTTATTTTTAGCTAGC    | PCR of the <i>bpuR</i> -<br><i>tRNA</i> intergenic<br>EMSA competitor 6                                                    |
| BpurP-5         | GCTAGCTAAAAATAACATTACAATAAATC    | PCR of the <i>bpuR</i> -<br><i>tRNA</i> intergenic<br>EMSA competitor 7                                                    |
| BpurP-6         | GGACGCAATACAATAATTTACTTATAT      | PCR of the <i>bpuR</i> -<br><i>tRNA</i> intergenic<br>EMSA competitor 7                                                    |

|               |                          |                                      |
|---------------|--------------------------|--------------------------------------|
| <i>bpuR-F</i> | GGCTCTTCTGCAAGGCATAAT    | qRT-PCR of <i>bpuR</i><br>transcript |
| <i>bpuR-F</i> | GCCCGCCTGATAAATGAGATT    | qRT-PCR of <i>bpuR</i><br>transcript |
| <i>flaB-F</i> | CCTTCTCAAGGCGGAGTTAAT    | qRT-PCR of <i>flaB</i><br>transcript |
| <i>flaB-R</i> | GCTGCTACAACCTCATCTGT     | qRT-PCR of <i>flaB</i><br>transcript |
| <i>hslU-F</i> | CAAACCGCCAATCCCATATC     | qRT-PCR of <i>hslU</i><br>transcript |
| <i>hslU-R</i> | GCAGGTGAGCTTGATGATACTA   | qRT-PCR of <i>hslU</i><br>transcript |
| <i>hslV-F</i> | ATGATGCTTGTTGCTGATTCTAAC | qRT-PCR of <i>hslV</i><br>transcript |
| <i>hslV-R</i> | CACCACTGCCAATCGAAATAAC   | qRT-PCR of <i>hslV</i><br>transcript |
| <i>sodA-F</i> | TGTCCTGAGAGTGGCCTTA      | qRT-PCR of <i>sodA</i><br>transcript |
| <i>sodA-R</i> | GCATGCTCCCAAACATCAATAC   | qRT-PCR of <i>sodA</i><br>transcript |

45

46



47 **Table S3: RNA oligonucleotides used in this study.**

| <b>Oligonucleotide Name</b> | <b>Sequence (5' -&gt; 3')</b>                                           |
|-----------------------------|-------------------------------------------------------------------------|
| <i>sodA1</i>                | AAUGAGCCUUGUUAUUGUGGAAGUGGGAAGAAUAUAAAAAUUGUCAUG<br>GCAAAAGUUA          |
| <i>sodA2</i>                | UCAUGGCAAAGUUAAAACAGGAGGUUUUAUGUUUAAGCUGCCAGAAC<br>UUGGUUAUGAU          |
| <i>bpuR</i>                 | ACGUUAAAUGUAGUCAAGUACAAAACUUGUGUGGAGGAAUUGAUGGG<br>AGAGAGAGGGGAAGUAUACU |

48

49
